# Supplementary material for: Identifying lithium difluoro(oxalate)borate as a multifunctional electrolyte additive to enable high-voltage Li4Ti5O12 lithium-ion batteries
Source: Royal Society of Chemistry journal article supplement (doi:10.1039/d4ta00750f), 2024-01-01
Supplement: d4ta00750f1.pdf [file d4ta00750f1.pdf]

## Supporting Information

### **Identifying lithium difluoro(oxalate)borate as a multifunctional electrolyte additive to enable high-voltage $\text{Li}_4\text{Ti}_5\text{O}_{12}$ lithium-ion batteries**

Ou Ka<sup>a, c</sup>, Fang Cheng<sup>b, c, \*</sup>, Lang Wen<sup>a, c</sup>, Xiaoqu Wang<sup>a, c</sup>, Ting Wang<sup>a, c</sup>, Xinyu Zeng<sup>a, c</sup>, Wen Lu<sup>a, b, c, \*</sup>, Liming Dai<sup>d, \*</sup>

<sup>a</sup> School of Materials and Energy, Yunnan University, Kunming 650091, China

<sup>b</sup> College of Chemical Science and Engineering, Yunnan University, Kunming 650091, China

<sup>c</sup> Institute of Energy Storage Technologies, Yunnan University, Kunming 650091, China

<sup>d</sup> Australian Carbon Materials Centre (A-CMC), School of Chemical Engineering, University of New South Wales, Sydney, NSW, 2052, Australia

\*Corresponding authors.

E-mail addresses: chengfang@ynu.edu.cn, wenlu@ynu.edu.cn, l.dai@unsw.edu.au

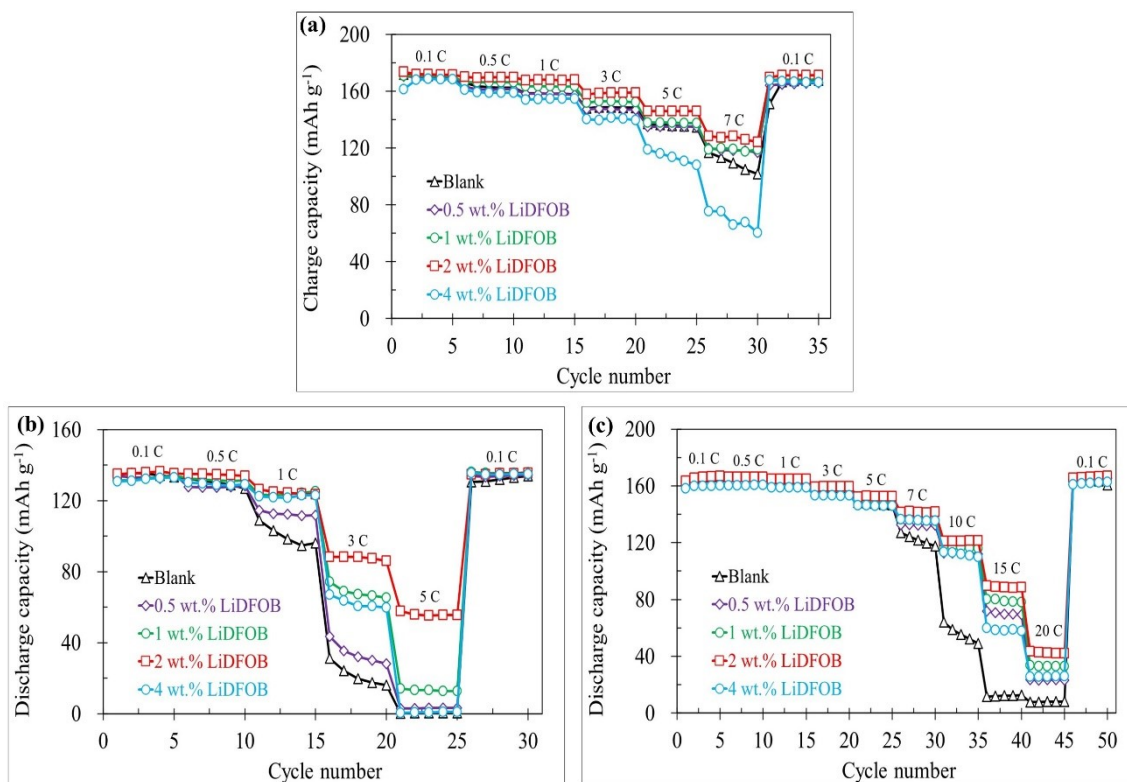

**Figure S1.** Charge/discharge capacities obtained at different currents (at each current, a same current is used for charge and discharge) with the blank and various LiDFOB-containing electrolytes for (a) the LTO electrode (Cut-off potential: 1.0 ~ 2.5 V), (b) the LNMO electrode (Cut-off potential: 3.5 ~ 4.95 V), and (c) the LNMO//LTO battery ( $C/A = 1.2:1$ . Cut-off voltage: 2.0 ~ 3.5 V).

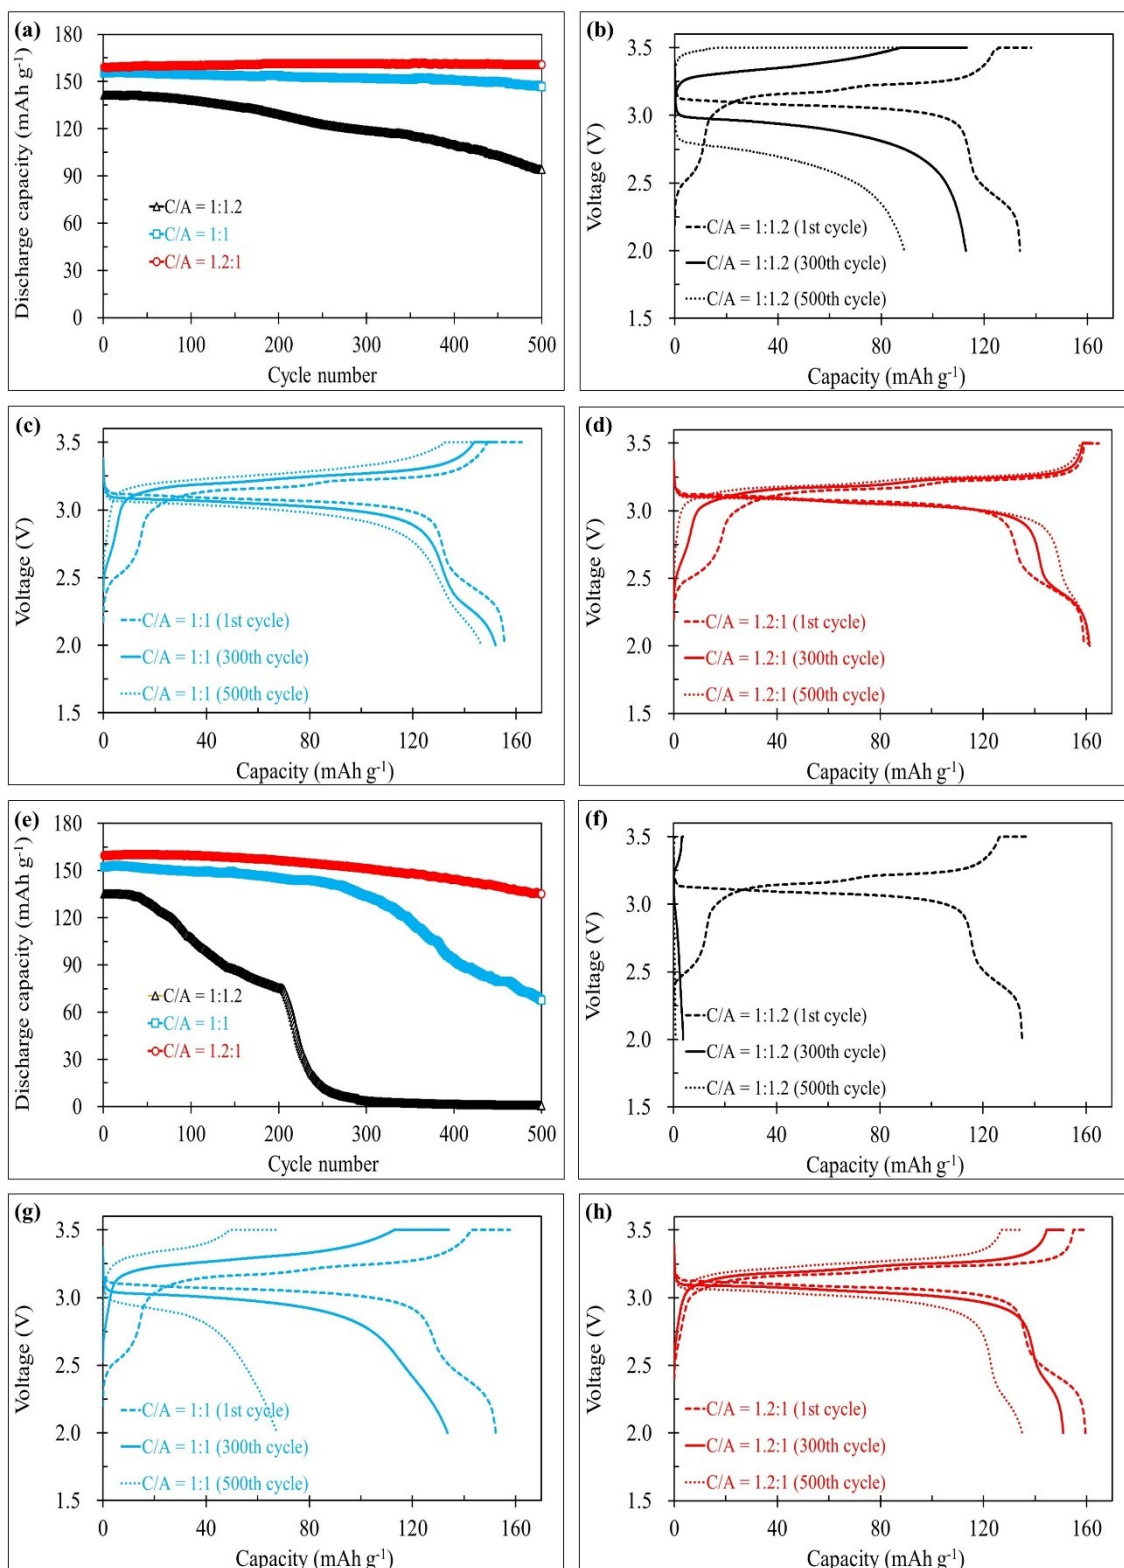

**Figure S2.** (a, e) Cycling performances and (b-d, f-h) corresponding GCD profiles of the LNMO//LTO batteries fabricated from the (a-d) 2 wt.% LiDFOB-containing and (e-h) blank

electrolytes with various C/A ratios. Cut-off voltage: 2.0 ~ 3.5 V. Charge/discharge current: 1

C.

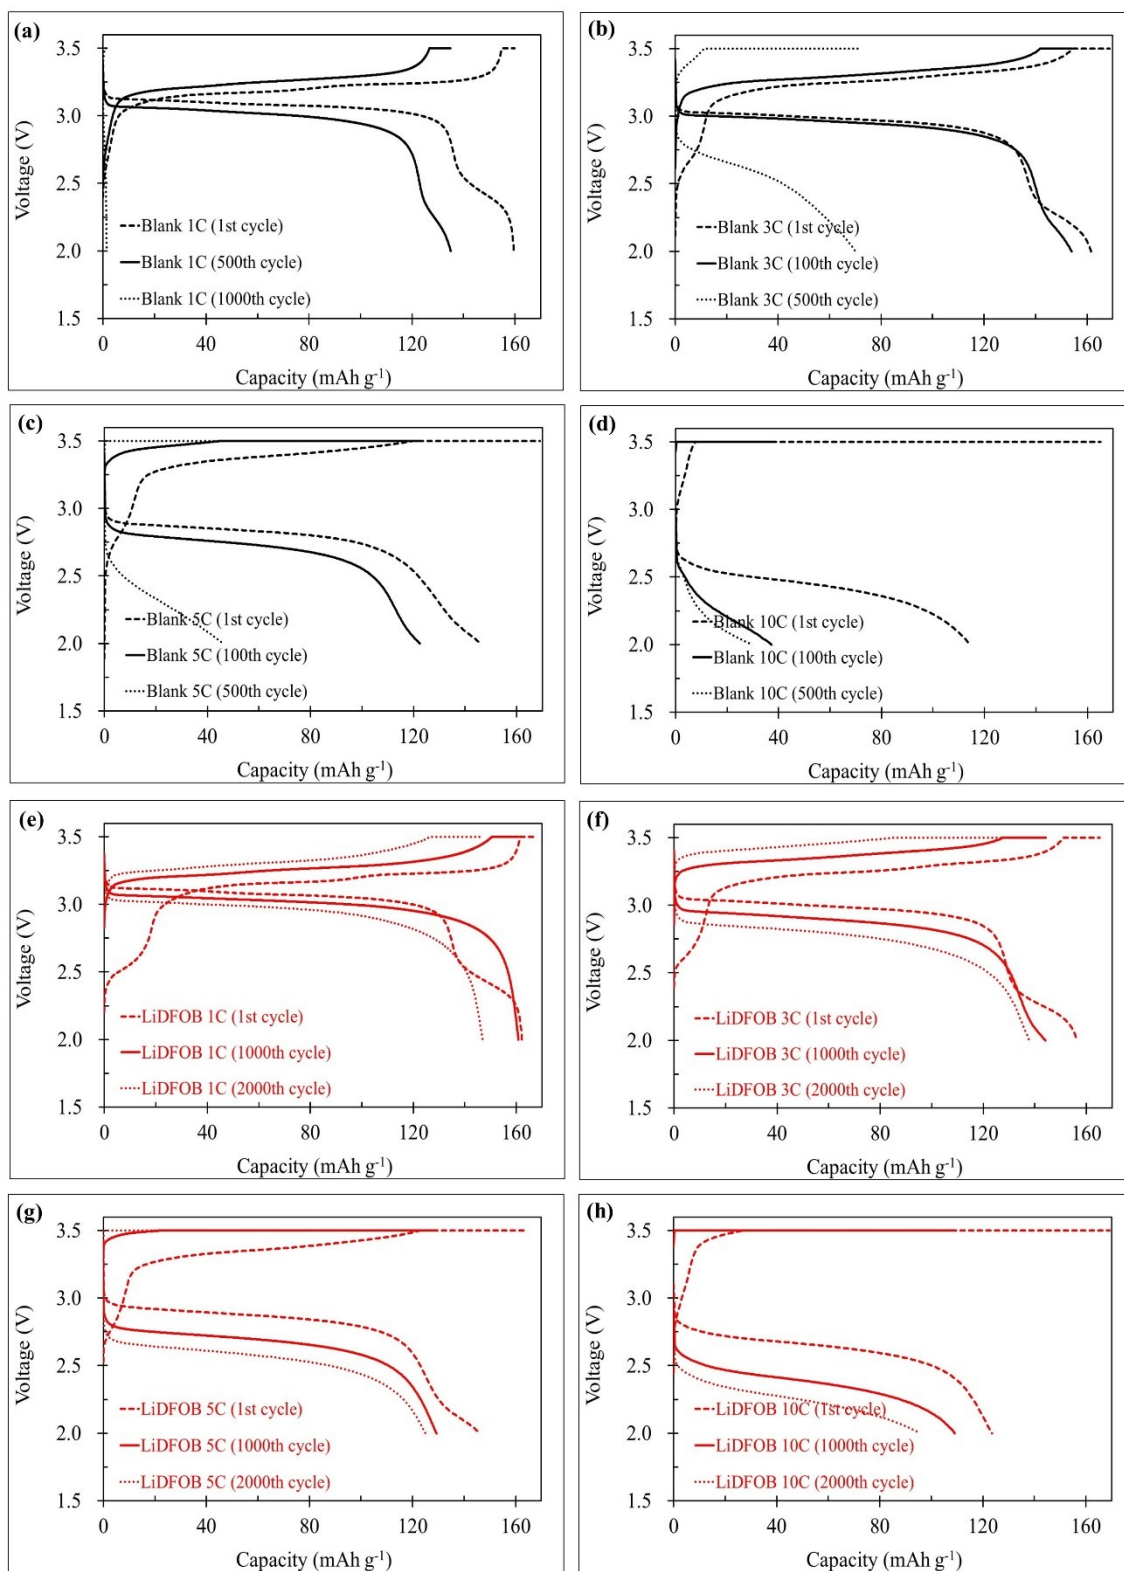

**Figure S3.** GCD profiles of the LNMO//LTO batteries of Figure 5 fabricated from the (a-d) blank and (e-h) 2 wt.% LiDFOB-containing electrolytes upon charge/discharge at (a, e) 1 C, (b, f) 3 C, (c, g) 5 C, and (d, h) 10 C, respectively.

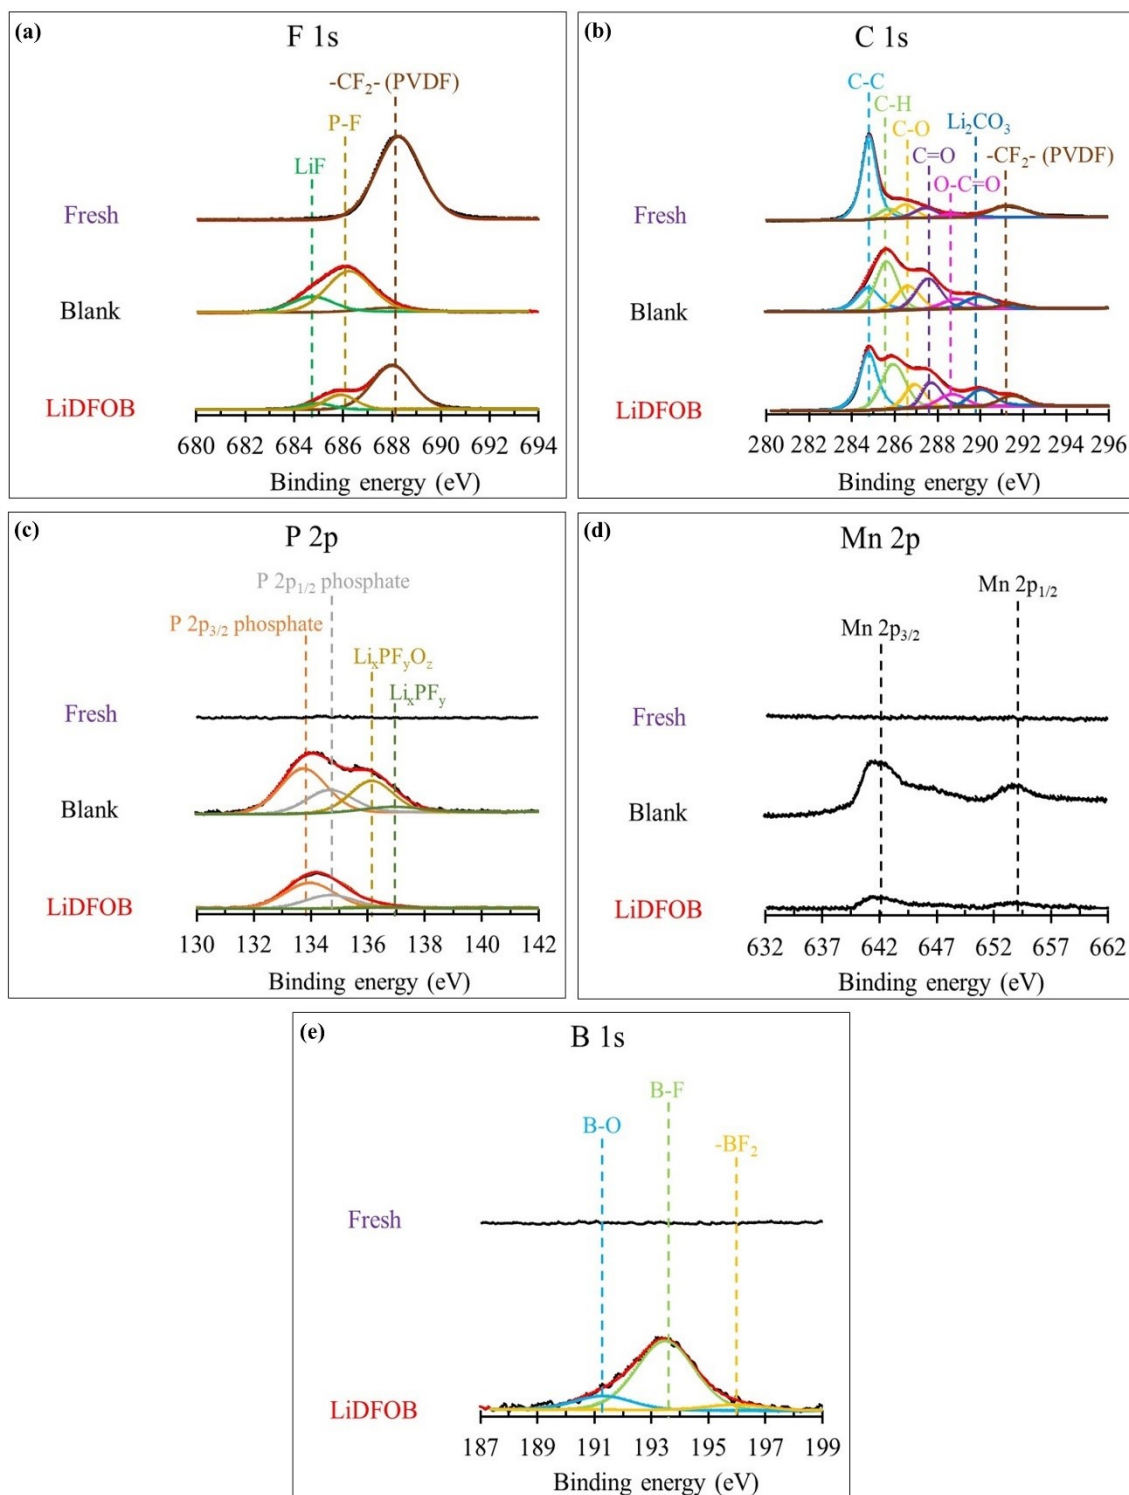

**Figure S4.** (a) F 1s XPS, (b) C 1s XPS, (c) P 2p XPS, (d) Mn 2p XPS, and (e) B 1s XPS spectra of the fresh and cycled LTO anodes of the LNMO//LTO batteries fabricated from the blank and 2 wt.% LiDFOB-containing electrolytes. C/A = 1.2:1. Cut-off voltage: 2.0 ~ 3.5 V. Charge/discharge current: 1 C. Cycle number: 600.

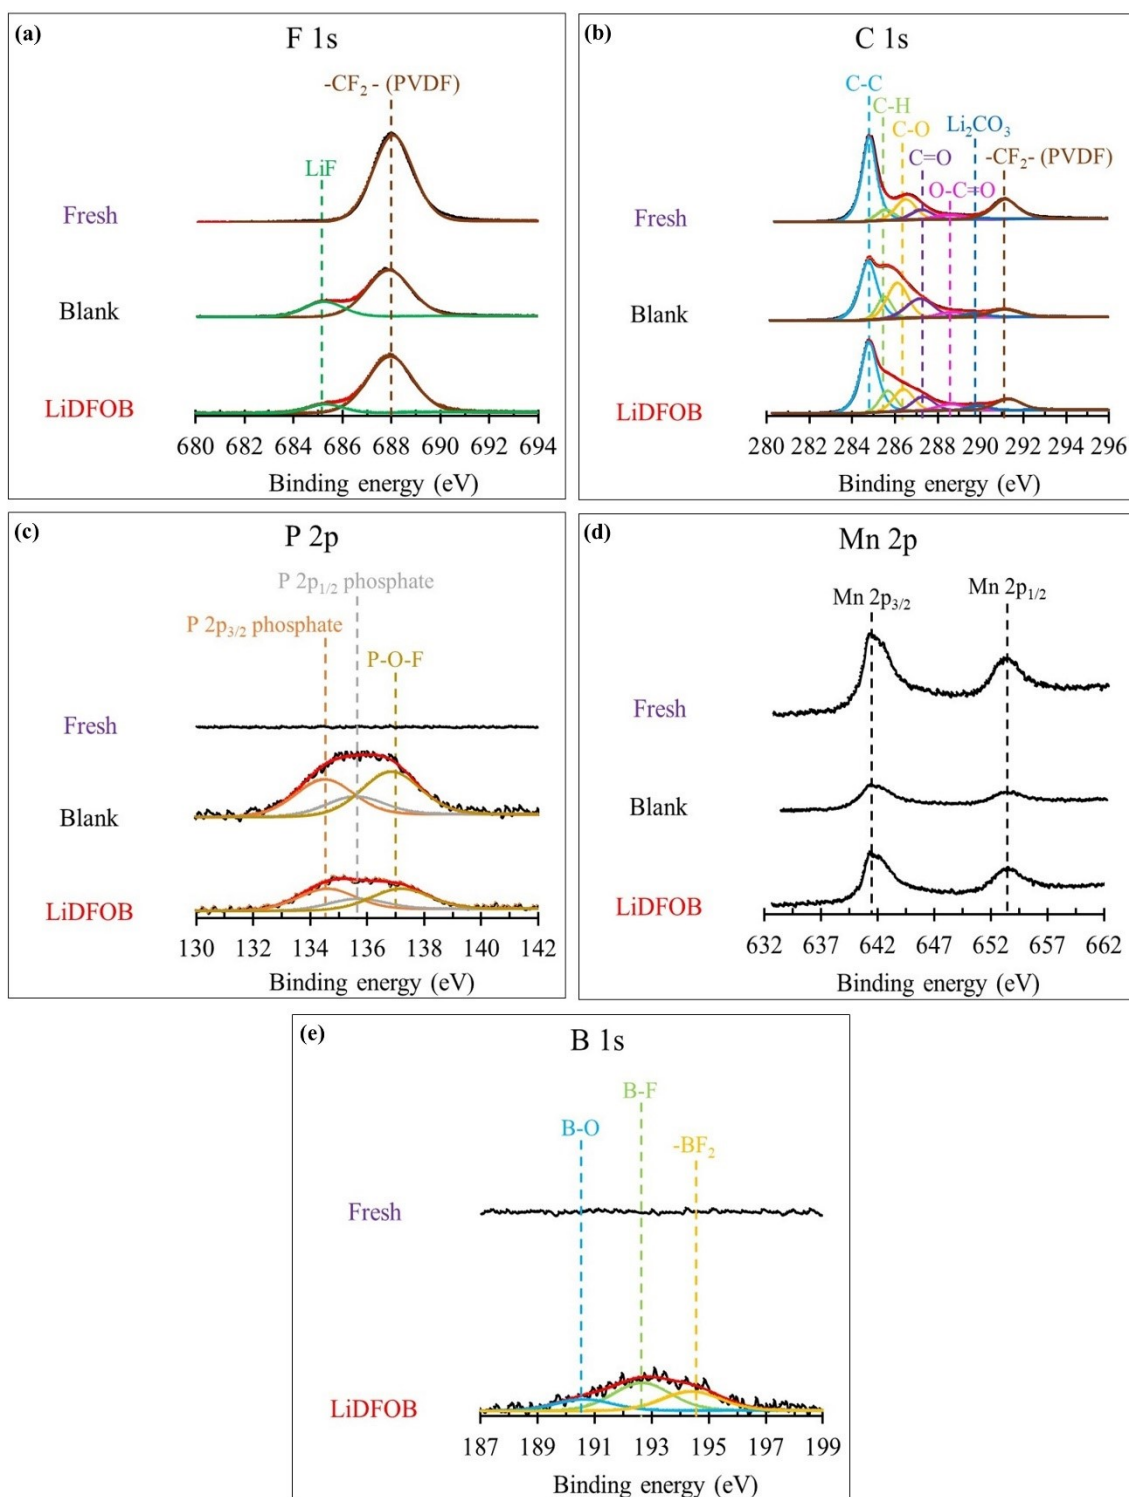

**Figure S5.** (a) F 1s XPS, (b) C 1s XPS, (c) P 2p XPS, (d) Mn 2p XPS, and (e) B 1s XPS spectra of the fresh and cycled LNMO cathodes of the LNMO//LTO batteries fabricated from the blank and 2 wt.% LiDFOB-containing electrolytes. C/A = 1.2:1. Cut-off voltage: 2.0 ~ 3.5 V. Charge/discharge current: 1 C. Cycle number: 600.

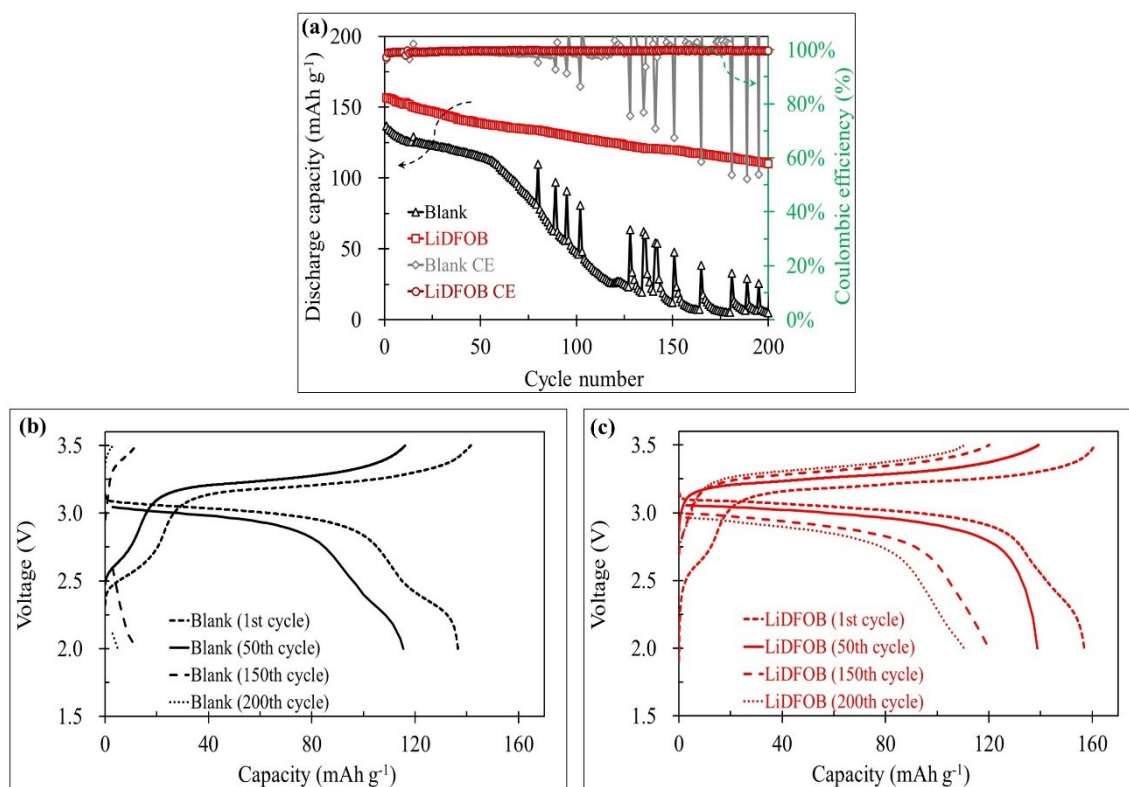

**Figure S6.** (a) Cycling performances and (b, c) corresponding GCD profiles of the LNMO//LTO batteries fabricated from the (b) blank and (c) 2 wt.% LiDFOB-containing electrolytes. C/A = 1.2:1. Cut-off voltage: 2.0 ~ 3.5 V. Charge/discharge current: 1 C. Temperature: 55 °C.



**Table S1.** Performance comparison of LNMO//LTO batteries between the present work and the relevant literature results.

| Research focus       | Electrolyte                                                | Mass loading of electrodes (mg cm <sup>-2</sup> ) | Cut-off voltage (V) | Rate capability                                                                                                                                                    | Room-temperature cycling stability                                                                                                                | High-temperature cycling stability      | Energy density (Wh kg <sup>-1</sup> ) | Power density (kW kg <sup>-1</sup> ) | Reference |
|----------------------|------------------------------------------------------------|---------------------------------------------------|---------------------|--------------------------------------------------------------------------------------------------------------------------------------------------------------------|---------------------------------------------------------------------------------------------------------------------------------------------------|-----------------------------------------|---------------------------------------|--------------------------------------|-----------|
| Electrolyte additive | 2 wt.% LiDFOB / 1 M LiPF <sub>6</sub> / EC:DMC:EMC (1:1:1) | Cathode: 12<br>Anode: 8                           | 2.0-3.5             | 0.1 C capacity: 166.2 mAh g <sup>-1</sup><br>1 C/0.1 C retention: 99.2%<br>3 C/0.1 C retention: 96.0%<br>5 C/0.1 C retention: 91.8%<br>10 C/0.1 C retention: 73.0% | 1 C 2000th-cycle retention: 90.9%<br>3 C 2000th-cycle retention: 88.1%<br>5 C 2000th-cycle retention: 85.6%<br>10 C 2000th-cycle retention: 77.3% | 55°C / 1 C 200th-cycle retention: 70.3% | 523.6                                 | 10.8                                 | This work |
| LTO anode            | 1 M LiPF <sub>6</sub> / EC:DEC (1:1)                       | Anode: 3.0-3.5                                    | 1.7-3.4             | 0.5 C capacity: 126.0 mAh g <sup>-1</sup><br>1 C/0.5 C retention: 95.2%<br>2 C/0.5 C retention: 88.9%<br>5 C/0.5 C retention: 75.4%<br>10 C/0.5 C retention: 64.3% | 3 C 1000th-cycle retention: 93.4%                                                                                                                 | —                                       | 396.9*                                | —                                    | [34]      |

|           |                                                  |                                    |          |                                                                                                                                                                    |                                  |   |        |   |      |
|-----------|--------------------------------------------------|------------------------------------|----------|--------------------------------------------------------------------------------------------------------------------------------------------------------------------|----------------------------------|---|--------|---|------|
| LTO anode | 1 M LiPF <sub>6</sub> / EC:DMC:EMC (1:1:1)       | Anode: 2.87                        | 2.0-3.45 | 0.1 C capacity: 131.2 mAh g <sup>-1</sup><br>1 C/0.1 C retention: 96.9%<br>2 C/0.1 C retention: 93.8%<br>5 C/0.1 C retention: 89.2%<br>10 C/0.1 C retention: 83.2% | 5 C 500th-cycle retention: 97.3% | — | 413.3* | — | [35] |
| LTO anode | 1 M LiPF <sub>6</sub> / EC:DEC (1:1)             | Cathode: 1.3-1.9<br>Anode: 1.3-1.9 | 1.6-3.4  | 0.5 C capacity: 128.0 mAh g <sup>-1</sup><br>1 C/0.5 C retention: 92.2%<br>2 C/0.5 C retention: 85.9%<br>5 C/0.5 C retention: 78.1%<br>10 C/0.5 C retention: 69.5% | 5 C 500th-cycle retention: 89.5% | — | 403.2* | — | [36] |
| LTO anode | 1 M LiPF <sub>6</sub> / EC:DEC:DMC:EMC (1:1:1:3) | —                                  | 2.0-3.5  | 0.1 C capacity: 164.8 mAh g <sup>-1</sup><br>1 C/0.1 C retention: 82.3%<br>3 C/0.1 C retention: 59.2%<br>5 C/0.1 C retention: 28.2%                                | —                                | — | 519.1* | — | [37] |

|                            |                                                     |              |          |                                                                                                                                     |                                          |                                         |        |   |      |
|----------------------------|-----------------------------------------------------|--------------|----------|-------------------------------------------------------------------------------------------------------------------------------------|------------------------------------------|-----------------------------------------|--------|---|------|
| LNMO cathode               | 1 M LiPF <sub>6</sub> / EC:DMC (1:1)                | —            | —        | —                                                                                                                                   | 1 C 200th-cycle retention: 92.4%         | —                                       | —      | — | [38] |
| LNMO cathode               | 1 M LiPF <sub>6</sub> / EC:DMC (1:1)                | Cathode: 2.0 | 2.0-3.5  | 0.1 C capacity: 129.4 mAh g <sup>-1</sup><br>1 C/0.1 C retention: 68.1%<br>2 C/0.1 C retention: 61.3%<br>5 C/0.1 C retention: 45.7% | 1 C 100th-cycle retention: 85.2%         | 55°C / 2 C 100th-cycle retention: 88.9% | 407.6* | — | [39] |
| LNMO cathode               | 1 M LiPF <sub>6</sub> / EC:DMC (1:1)                | Cathode: 3.5 | 2.0-3.5  | —                                                                                                                                   | 1 C 200th-cycle retention: 97.6%         | —                                       | —      | — | [40] |
| LNMO cathode               | 1 M LiPF <sub>6</sub> / FEC:DEC (1:4)               | —            | 2.0-3.5  | —                                                                                                                                   | 1 C 100th-cycle retention: 93.4%         | —                                       | —      | — | [41] |
| LTO anode and LNMO cathode | 1 M LiPF <sub>6</sub> / EC:DMC (1:1)                | —            | 2.0-4.0  | —                                                                                                                                   | 1 C 200th-cycle retention: 87.0%         | —                                       | —      | — | [42] |
| LTO anode and LNMO cathode | 1 M LiPF <sub>6</sub> / EC:DMC (1:1)                | —            | 2.0-3.5  | —                                                                                                                                   | 1 C 200th-cycle retention: 94.0%         | —                                       | —      | — | [43] |
| Electrolyte solvent        | 1.2 M LiPF <sub>6</sub> / F-AEC:F-EMC:F-EPE (2:6:2) | —            | 2.0-3.45 | —                                                                                                                                   | 0.5 C 200th-cycle retention: almost 100% | —                                       | —      | — | [44] |
| Electrolyte solvent        | 1M LiPF <sub>6</sub> / PC:HFE (8:2)                 | —            | 2.0-3.5  | 0.1 C capacity: 152.0 mAh g <sup>-1</sup><br>1 C/0.1 C retention:                                                                   | 1 C 200th-cycle retention: 92.5%         | —                                       | 478.8* | — | [45] |

|                                   |                                                                                   |                                    |         |                                                                                                       |                                    |                                                                                      |        |   |      |
|-----------------------------------|-----------------------------------------------------------------------------------|------------------------------------|---------|-------------------------------------------------------------------------------------------------------|------------------------------------|--------------------------------------------------------------------------------------|--------|---|------|
|                                   |                                                                                   |                                    |         | 96.7%<br>6 C/0.1 C retention:<br>80.9%                                                                |                                    |                                                                                      |        |   |      |
| Electrolyte solvent               | 1 M LiPF <sub>6</sub> / TMP:FEPE (8:2)                                            | —                                  | 2.0-3.5 | 0.1 C capacity: 140.8 mAh g <sup>-1</sup><br>4 C/0.1 C retention: 49.2%                               | 1 C 118th-cycle retention: 98.5%   | —                                                                                    | 443.5* | — | [46] |
| Electrolyte additive              | 1 wt.% LiO-t-C <sub>4</sub> F <sub>9</sub> / 1 M LiPF <sub>6</sub> / EC:DMC (1:1) | —                                  | 1.5-3.5 | —                                                                                                     | 0.05 C 50th-cycle retention: 98.5% | —                                                                                    | —      | — | [47] |
| Electrolyte additive              | 1 wt.% FEC / 1 M LiPF <sub>6</sub> / EC:DEC (1:1)                                 | Cathode: 11.8                      | 1.5-3.5 | 0.1 C capacity: 128.0 mAh g <sup>-1</sup><br>1 C/0.1 C retention: 85.2%<br>5 C/0.1 C retention: 78.1% | 1 C 500th-cycle retention: 48.3%   | 55°C / 0.5 C 100th-cycle retention: 13.0%                                            | 403.2* | — | [48] |
| Electrolyte solvent/salt          | 0.7 M LiTFSI / MMMPyrTFSI                                                         | Cathode: 2.9-3.5<br>Anode: 2.9-3.5 | 1.4-3.4 | —                                                                                                     | —                                  | 40°C / 0.5 C 50th-cycle retention: 68.6%<br>60°C / 0.5 C 50th-cycle retention: 74.1% | —      | — | [49] |
| Electrolyte solvent/salt/additive | 2 % FEC / 2 M LiBF <sub>4</sub> / GBL:AND (1:1)                                   | —                                  | 2.0-3.5 | 0.1 C capacity: 120.2 mAh g <sup>-1</sup><br>1 C/0.1 C retention:                                     | 1 C 100th-cycle retention: 84.0%   | —                                                                                    | 378.6* | — | [50] |

|                                       |                                                                     |                                 |         |                                                                                                                                     |                                                                                                           |                                              |        |   |      |
|---------------------------------------|---------------------------------------------------------------------|---------------------------------|---------|-------------------------------------------------------------------------------------------------------------------------------------|-----------------------------------------------------------------------------------------------------------|----------------------------------------------|--------|---|------|
|                                       |                                                                     |                                 |         | 74.9%<br>2 C/0.1 C retention:<br>60.8%<br>5 C/0.1 C retention:<br>45.8%                                                             |                                                                                                           |                                              |        |   |      |
| Polymer electrolyte                   | LiPF <sub>6</sub> / PAMM                                            | Anode: 1.96                     | 2.0-3.5 | 0.1 C capacity: 129.0 mAh g <sup>-1</sup><br>5 C/0.1 C retention:<br>38.6%                                                          | 1 C 100th-cycle retention: 88.4%                                                                          | 55°C / 1 C<br>23rd-cycle retention:<br>71.2% | 406.4* | — | [51] |
| Aqueous electrolyte                   | 1 mol LiTFSI /<br>0.5 mol TMS / 1<br>mol Water                      | Cathode:<br>2.73<br>Anode: 1.29 | 2.0-3.5 | —                                                                                                                                   | 3 C 150th-cycle retention: 62.4%<br>6 C 300th-cycle retention: 64.3%                                      | —                                            | 408.0* | — | [52] |
| Aqueous-nonaqueous hybrid electrolyte | (21 M LiTFSI in water) : (1 mol LiTFSI / 1.2 mol DMC) = 1:1 by mass | Cathode: 8<br>Anode: 4          | 2.0-3.5 | 0.5 C capacity: 162.1 mAh g <sup>-1</sup><br>1 C/0.5 C retention: 94.4%<br>4 C/0.5 C retention: 75.9%<br>6 C/0.5 C retention: 58.0% | 0.5 C 200th-cycle retention: 89.4%<br>6 C 1000th-cycle retention: 76.0%                                   | —                                            | 510.6* | — | [53] |
| Current collector                     | 1 M LiPF <sub>6</sub> /<br>EC:DMC (1:1)                             | —                               | 2.0-3.4 | 0.1 C capacity: 115.0 mAh g <sup>-1</sup><br>1 C/0.1 C retention: 95.6%<br>3 C/0.1 C retention: 89.2%<br>5 C/0.1 C retention:       | 1 C 500th-cycle retention: 98.5%<br>5 C 500th-cycle retention: 95.5%<br>10 C 500th-cycle retention: 84.7% | —                                            | 362.2* | — | [54] |

|           |                                         |                            |         |                                                         |                                     |   |   |   |      |
|-----------|-----------------------------------------|----------------------------|---------|---------------------------------------------------------|-------------------------------------|---|---|---|------|
|           |                                         |                            |         | 83.8%<br>8 C/0.1 C retention:<br>76.9%<br>Charge: 0.1 C |                                     |   |   |   |      |
| Separator | 1 M LiPF <sub>6</sub> /<br>EC:DEC (1:1) | Cathode: 3.4<br>Anode: 2.6 | 2.0-3.5 | —                                                       | 1 C 100th-cycle<br>retention: 98.1% | — | — | — | [55] |

\*Energy density is calculated based on the active material mass of the determining electrode (LTO anode or LNMO cathode) and the discharge capacity and voltage (3.15 V) of the battery.

**Table S2.** EIS parameters of the LTO electrodes measured in Figure 2e.

| Condition                             | Parameter                   | Electrolyte |                          |
|---------------------------------------|-----------------------------|-------------|--------------------------|
|                                       |                             | Blank       | 2 wt.% LiDFOB-containing |
| After activated at 0.1 C for 5 cycles | $R_s$ ( $\Omega$ )          | 7.38        | 2.89                     |
|                                       | $R_f$ ( $\Omega$ )          | 27.47       | 10.28                    |
|                                       | $R_{ct}$ ( $\Omega$ )       | 93.91       | 79.74                    |
|                                       | Slope of low-frequency tail | 0.94        | 1.17                     |

**Table S3.** EIS parameters of the LNMO electrodes measured in Figure 3e.

| Condition                             | Parameter                   | Electrolyte |                          |
|---------------------------------------|-----------------------------|-------------|--------------------------|
|                                       |                             | Blank       | 2 wt.% LiDFOB-containing |
| After activated at 0.1 C for 5 cycles | $R_s$ ( $\Omega$ )          | 8.35        | 5.71                     |
|                                       | $R_f$ ( $\Omega$ )          | 169.80      | 147.80                   |
|                                       | $R_{ct}$ ( $\Omega$ )       | 10.86       | 2.42                     |
|                                       | Slope of low-frequency tail | 0.35        | 0.75                     |



**Table S4.** EIS parameters of the LNMO//LTO batteries measured in Figures 5a, e.

| Condition                             | Parameter                   | Electrolyte |                          |
|---------------------------------------|-----------------------------|-------------|--------------------------|
|                                       |                             | Blank       | 2 wt.% LiDFOB-containing |
| After activated at 0.1 C for 5 cycles | $R_s$ ( $\Omega$ )          | 3.26        | 2.25                     |
|                                       | $R_f$ ( $\Omega$ )          | 34.92       | 24.41                    |
|                                       | $R_{ct}$ ( $\Omega$ )       | 6.73        | 3.41                     |
|                                       | Slope of low-frequency tail | 1.09        | 1.48                     |
| After cycled at 1 C for 600 cycles    | $R_s$ ( $\Omega$ )          | 5.20        | 2.31                     |
|                                       | $R_f$ ( $\Omega$ )          | 72.03       | 32.95                    |
|                                       | $R_{ct}$ ( $\Omega$ )       | 22.34       | 6.41                     |
|                                       | Slope of low-frequency tail | 0.82        | 1.20                     |
